# Supplementary material
Source: MDPI journal article supplement (https://www.mdpi.com/1996-1073/16/15/5637)
Supplement: s1 [file s1]

Archive with 2 entries (2 files):
- 1625 I polytype.cif
- energies-2466614-supplementary.pdf
