# Supplementary material
Source: MDPI journal article supplement (https://www.mdpi.com/1996-1073/16/15/5637)
Supplement: s1 [file s1 › 1625 I polytype.cif]

#==============================================================================
data_global
#==============================================================================

_audit_creation_date             '2023-04-06'
_audit_creation_method           'SmartLab Studio II (Rigaku)'
loop_
    _audit_conform_dict_name
    _audit_conform_dict_version
    _audit_conform_dict_location
    cif_core.dic 2.4.2  ftp://ftp.iucr.org/pub/cif_core.dic
    cif_pd.dic   1.0.1  ftp://ftp.iucr.org/pub/cif_pd.dic

#==============================================================================
data_I_polytype
#==============================================================================
# CHEMICAL DATA

_chemical_name_systematic
;
    ?
;
_chemical_name_common            'I polytype'
_chemical_formula_structural     'La18 O57 W10'
_chemical_formula_analytical      ?
_chemical_formula_moiety          ?
_chemical_formula_sum            'La18 O57 W10'
_chemical_formula_weight          5250.66
_chemical_melting_point           ?
_chemical_compound_source         ?

#==============================================================================
# CRYSTAL DATA

_space_group_crystal_system           hexagonal
_space_group_name_H-M_alt            'P -6 2 c'
_space_group_name_Hall               ' P -6c -2c'
loop_
    _symmetry_equiv_pos_site_id
    _symmetry_equiv_pos_as_xyz
    1  'x,y,z'
    2  '-y,x-y,z'
    3  '-x+y,-x,z'
    4  'x,y,1/2-z'
    5  '-y,x-y,1/2-z'
    6  '-x+y,-x,1/2-z'
    7  'y,x,1/2+z'
    8  '-x,-x+y,1/2+z'
    9  'x-y,-y,1/2+z'
    10  'y,x,-z'
    11  '-x,-x+y,-z'
    12  'x-y,-y,-z'

_cell_length_a                        9.039778
_cell_length_b                        9.039778
_cell_length_c                       32.681219
_cell_angle_alpha                    90
_cell_angle_beta                     90
_cell_angle_gamma                   120
_cell_volume                       2312.833941
_cell_formula_units_Z                 2
_cell_measurement_temperature         ?
_rigaku_reference_intensity_ratio     4.66

#==============================================================================
# ATOMIC COORDINATES AND DISPLACEMENT PARAMETERS

loop_
    _atom_site_label
    _atom_site_type_symbol
    _atom_site_Wyckoff_symbol
    _atom_site_fract_x
    _atom_site_fract_y
    _atom_site_fract_z
    _atom_site_U_iso_or_equiv
    _atom_site_adp_type
    _atom_site_occupancy
    W1   W  e  0             0             0.08478(7)    0.000000  Uiso 1
    W2   W  b  0             0             0.25          0.000000  Uiso 1
    W3   W  f  0.666667      0.333333      0.00356(5)    0.001636  Uiso 1
    W4   W  f  0.666667      0.333333      0.16661(6)    0.000000  Uiso 1
    W5   W  f  0.333333      0.666667      0.12943(10)   0.000000  Uiso 0.5
    W6   W  f  0.333333      0.666667      0.14463(9)    0.000615  Uiso 0.5
    W7   W  f  0.333333      0.666667      0.21931(9)    0.000000  Uiso 0.5
    La1  La i -0.003364      0.741447     -0.0004(11)    0.000000  Uiso 1
    La2  La i  0.240790      0.277439      0.16762(7)    0         Uiso 1
    La3  La i  0.430912      0.060181      0.2502(13)    0.000000  Uiso 1
    La4  La i  0.614364      0.575342      0.08359(6)    0.001591  Uiso 1
    O1   O  i  0.188815      0.009130      0.2104(5)     0.000000  Uiso 1
    O2   O  i  0.493843      0.330132      0.1291(4)     0.000000  Uiso 1
    O3   O  i  0.162521      0.972547      0.0438(5)     0.000000  Uiso 1
    O4   O  i  0.812186      0.521780      0.0485(4)     0.000000  Uiso 1
    O5   O  i  0.193921      0.036849      0.1235(6)     0.000000  Uiso 1
    O6   O  i  0.484500      0.304191      0.2085(4)     0.000000  Uiso 1
    O7   O  i  0.536938      0.827662      0.1009(4)     0.000000  Uiso 1
    O8   O  i  0.879324      0.416188      0.9713(4)     0.000000  Uiso 1
    O9   O  h  0.156542      0.707417      0.25          0.000000  Uiso 1
    O10  O  i  0.369105      0.903074      0.1775(4)     0.014144  Uiso 1
